# Supplementary material
Source: PubMed Central journal article supplement (PMC3814730)

## SUPPLEMENTARY TABLES

**Supplementary Table 1A Barcodes used for spiked-in controls**

| Primary samples             |                 |
|-----------------------------|-----------------|
| Barcode                     | Number of cells |
| TCATCCTGATGCAAATTGGTGTAACCC | 500             |
| AGATCTAGATGGAAAGGGGTCCAACCA | 100             |
| GCATCACGATGGAAATAGGTTGAACTT | 20              |
|                             |                 |
| Secondary samples           |                 |
| Barcode                     | Number of cells |
| AGATCCTGATGCAAACGGGTCAAACAC | 500             |
| TAATCTCGATCGAAAATGGTAGAACTT | 100             |
| AGATCTAGATGGAAAGGGGTCCAACCA | 20              |

**Supplementary Table 1B Fraction read abundance for primary transplant data (56 samples)**

| Library | 500 cell control |                         | 100 cell control |                         | 20 cell control |                         |
|---------|------------------|-------------------------|------------------|-------------------------|-----------------|-------------------------|
|         | Number of reads  | Fraction read abundance | Number of reads  | Fraction read abundance | Number of reads | Fraction read abundance |
| 10126   | 328008           | 0.9338                  | 20421            | 0.0581                  | 2820            | 0.0080                  |
| 10127   | 397459           | 0.9271                  | 25099            | 0.0585                  | 6155            | 0.0144                  |
| 10128   | 455992           | 0.9292                  | 28861            | 0.0588                  | 5881            | 0.0120                  |
| 10135   | 512180           | 0.9228                  | 38795            | 0.0699                  | 4080            | 0.0074                  |
| 10136   | 627401           | 0.9402                  | 33182            | 0.0497                  | 6725            | 0.0101                  |
| 10137   | 614739           | 0.9200                  | 46933            | 0.0702                  | 6525            | 0.0098                  |
| 10147   | 9190             | 0.9086                  | 805              | 0.0796                  | 120             | 0.0119                  |
| 10149   | 174144           | 0.9186                  | 12573            | 0.0663                  | 2859            | 0.0151                  |
| 10150   | 6445             | 0.9330                  | 419              | 0.0607                  | 44              | 0.0064                  |
| 10151   | 57242            | 0.9097                  | 5104             | 0.0811                  | 576             | 0.0092                  |
| 10152   | 519248           | 0.9382                  | 30187            | 0.0545                  | 4012            | 0.0072                  |
| 10153   | 29369            | 0.9133                  | 2114             | 0.0657                  | 673             | 0.0209                  |
| 10154   | 9078             | 0.9459                  | 364              | 0.0379                  | 155             | 0.0162                  |
| 10155   | 412287           | 0.9125                  | 31516            | 0.0698                  | 8035            | 0.0178                  |
| 10156   | 234543           | 0.9507                  | 10950            | 0.0444                  | 1221            | 0.0049                  |
| 10157   | 7544             | 0.9417                  | 382              | 0.0477                  | 85              | 0.0106                  |
| 10158   | 504317           | 0.9210                  | 33111            | 0.0605                  | 10136           | 0.0185                  |
| 10159   | 7532             | 0.9443                  | 333              | 0.0418                  | 111             | 0.0139                  |
| 10160   | 594854           | 0.9509                  | 27336            | 0.0437                  | 3370            | 0.0054                  |
| 10161   | 12283            | 0.9337                  | 670              | 0.0509                  | 202             | 0.0154                  |
| 10162   | 29690            | 0.9362                  | 1692             | 0.0534                  | 332             | 0.0105                  |
| 10163   | 135360           | 0.9401                  | 6342             | 0.0440                  | 2279            | 0.0158                  |
| 10164   | 419987           | 0.9132                  | 33186            | 0.0722                  | 6746            | 0.0147                  |
| 10165   | 515517           | 0.9377                  | 26759            | 0.0487                  | 7509            | 0.0137                  |
| 10166   | 40598            | 0.9105                  | 3383             | 0.0759                  | 610             | 0.0137                  |
| 10167   | 643455           | 0.9755                  | 10015            | 0.0152                  | 6162            | 0.0093                  |
| 10168   | 30986            | 0.9247                  | 2138             | 0.0638                  | 384             | 0.0115                  |
| 10169   | 331810           | 0.8871                  | 37686            | 0.1008                  | 4537            | 0.0121                  |
| 10170   | 566268           | 0.9685                  | 13877            | 0.0237                  | 4530            | 0.0077                  |
| 10171   | 174277           | 0.9233                  | 12408            | 0.0657                  | 2075            | 0.0110                  |
| 10172   | 97975            | 0.9242                  | 5838             | 0.0551                  | 2197            | 0.0207                  |
| 10173   | 153832           | 0.9426                  | 7368             | 0.0451                  | 1998            | 0.0122                  |
| 10174   | 309692           | 0.9402                  | 13426            | 0.0408                  | 6275            | 0.0191                  |
| 10175   | 482077           | 0.9370                  | 26085            | 0.0507                  | 6339            | 0.0123                  |

|       |        |        |       |        |      |        |
|-------|--------|--------|-------|--------|------|--------|
| 10176 | 90404  | 0.7361 | 31139 | 0.2535 | 1273 | 0.0104 |
| 10177 | 395158 | 0.9086 | 35277 | 0.0811 | 4471 | 0.0103 |
| 10179 | 311827 | 0.9257 | 19402 | 0.0576 | 5637 | 0.0167 |
| 10180 | 287203 | 0.9325 | 20781 | 0.0675 | 24   | 0.0001 |
| 10181 | 20749  | 0.9043 | 2193  | 0.0956 | 2    | 0.0001 |
| 10182 | 348894 | 0.9494 | 15017 | 0.0409 | 3582 | 0.0097 |
| 10183 | 29678  | 0.9512 | 1088  | 0.0349 | 435  | 0.0139 |
| 10184 | 111615 | 0.8957 | 10048 | 0.0806 | 2954 | 0.0237 |
| 10185 | 401576 | 0.9272 | 23980 | 0.0554 | 7557 | 0.0174 |
| 10186 | 32950  | 0.9437 | 1760  | 0.0504 | 204  | 0.0058 |
| 10187 | 105428 | 0.8689 | 13163 | 0.1085 | 2746 | 0.0226 |
| 10188 | 261796 | 0.9383 | 11217 | 0.0402 | 6003 | 0.0215 |
| 10189 | 6127   | 0.9081 | 563   | 0.0834 | 57   | 0.0084 |
| 10190 | 442792 | 0.9108 | 34272 | 0.0705 | 9067 | 0.0187 |
| 10191 | 26814  | 0.9225 | 2105  | 0.0724 | 147  | 0.0051 |
| 10192 | 438044 | 0.9162 | 31570 | 0.0660 | 8483 | 0.0177 |
| 10193 | 165928 | 0.9413 | 9213  | 0.0523 | 1143 | 0.0065 |
| 10194 | 4267   | 0.9678 | 123   | 0.0279 | 19   | 0.0043 |
| 10195 | 59102  | 0.8876 | 5232  | 0.0786 | 2254 | 0.0338 |
| 10196 | 401846 | 0.9250 | 29206 | 0.0672 | 3357 | 0.0077 |
| 10197 | 30014  | 0.9180 | 2289  | 0.0700 | 391  | 0.0120 |
| 10198 | 415833 | 0.9446 | 21179 | 0.0481 | 3200 | 0.0073 |

The fraction read abundance was calculated using one of the following formulae:

# reads for 500 cell control / [sum of reads from the 500, 100 and 20 cell controls]

# reads for 100 cell control / [sum of reads from 500, 100 and 20 cell controls]

# reads for 20 cell control / [sum of reads from 500, 100 and 20 cell controls]

The fraction read abundance allows for normalization of the read abundance between experimental samples that have varying read depth from MPS, and/or varying clone numbers and sizes. The fraction read abundance is then used to derive a correlation with known input cell number to calculate the approximate size of experimentally detected clones in absolute cell number (**Supplementary Figure 2A**).

**Supplementary Table 1C Fraction read abundance for secondary transplant data (22 samples)**

| Library | 500 cell control |                         | 100 cell control |                         | 20 cell control |                         |
|---------|------------------|-------------------------|------------------|-------------------------|-----------------|-------------------------|
|         | Number of reads  | Fraction read abundance | Number of reads  | Fraction read abundance | Number of reads | Fraction read abundance |
| A23777  | 268877           | 0.9337                  | 10010            | 0.0348                  | 9067            | 0.0315                  |
| A23779  | 208913           | 0.9186                  | 9565             | 0.0421                  | 8943            | 0.0393                  |
| A23780  | 214487           | 0.9332                  | 8576             | 0.0373                  | 6770            | 0.0295                  |
| A23781  | 249936           | 0.9017                  | 14024            | 0.0506                  | 13220           | 0.0477                  |
| A23782  | 193583           | 0.9196                  | 11838            | 0.0562                  | 5093            | 0.0242                  |
| A23783  | 72082            | 0.9123                  | 3612             | 0.0457                  | 3313            | 0.0419                  |
| A23785  | 184038           | 0.9185                  | 9321             | 0.0465                  | 7005            | 0.0350                  |
| A23786  | 214828           | 0.9115                  | 10432            | 0.0443                  | 10416           | 0.0442                  |
| A23789  | 129747           | 0.9577                  | 4575             | 0.0338                  | 1153            | 0.0085                  |
| A23791  | 103798           | 0.9612                  | 3716             | 0.0344                  | 472             | 0.0044                  |
| A23794  | 4007             | 0.9375                  | 175              | 0.0409                  | 92              | 0.0215                  |
| A23795  | 140546           | 0.9248                  | 6916             | 0.0455                  | 4508            | 0.0297                  |
| A23796  | 151864           | 0.9049                  | 8115             | 0.0484                  | 7854            | 0.0468                  |
| A23797  | 221054           | 0.9166                  | 15281            | 0.0634                  | 4838            | 0.0201                  |
| A23800  | 224331           | 0.9547                  | 7525             | 0.0320                  | 3128            | 0.0133                  |
| A23806  | 80061            | 0.9255                  | 4466             | 0.0516                  | 1983            | 0.0229                  |
| A23807  | 242209           | 0.9262                  | 9839             | 0.0376                  | 9465            | 0.0362                  |
| A23808  | 118479           | 0.9423                  | 5443             | 0.0433                  | 1813            | 0.0144                  |
| A23811  | 140082           | 0.9269                  | 6361             | 0.0421                  | 4685            | 0.0310                  |
| A23813  | 160380           | 0.9315                  | 6136             | 0.0356                  | 5657            | 0.0329                  |
| A23815  | 79085            | 0.9195                  | 3805             | 0.0442                  | 3122            | 0.0363                  |
| A23819  | 84842            | 0.9233                  | 4277             | 0.0465                  | 2767            | 0.0301                  |

Fraction read abundance is calculated and used similarly to the primary mice described above (**Supplementary Table 1B**).

**Supplementary Table 2A Number of human hematopoietic cells collected from FACS from primary transplanted mice**

|         |           | # FACS sorted cells in primary transplant |         |                        |           |         |         |
|---------|-----------|-------------------------------------------|---------|------------------------|-----------|---------|---------|
|         |           | Mouse 1                                   | Mouse 2 |                        |           | Mouse 1 | Mouse 2 |
| Week 4  | Myeloid   | 34394                                     | 4054    | Week 27<br>(Left leg)  | Myeloid   | 1687    | 3447    |
|         | Erythroid | 2941                                      | 0       |                        | Erythroid | 109     | 36      |
|         | B cells   | 30317                                     | 2135    |                        | B cells   | 1528    | 489     |
|         | T cells   | 0                                         | 0       |                        | T cells   | 306     | 29396   |
|         | Total     | 67652                                     | 6189    |                        | Total     | 3630    | 33368   |
| Week 9  | Myeloid   | 1277                                      | 17934   | Week 27<br>(Right leg) | Myeloid   | 2789    | 431     |
|         | Erythroid | 0                                         | 64      |                        | Erythroid | 418     | 0       |
|         | B cells   | 36956                                     | 1130000 |                        | B cells   | 2804    | 348     |
|         | T cells   | 0                                         | 0       |                        | T cells   | 456     | 44270   |
|         | Total     | 38233                                     | 1147998 |                        | Total     | 6467    | 45049   |
| Week 16 | Myeloid   | 4081                                      | 1990    | Week 27<br>(Pelvis)    | Myeloid   | 4256    | 290     |
|         | Erythroid | 78                                        | 0       |                        | Erythroid | 736     | 260     |
|         | B cells   | 10319                                     | 6614    |                        | B cells   | 5249    | 180     |
|         | T cells   | 160                                       | 451     |                        | T cells   | 377     | 3929    |
|         | Total     | 14638                                     | 9055    |                        | Total     | 10618   | 4659    |

Myeloid: CD45<sup>+</sup>GFP<sup>+</sup>CD15/33<sup>+</sup>;  
 Erythroid: GFP<sup>+</sup>human glyophorin A<sup>+</sup>,  
 B cell: CD45<sup>+</sup>GFP<sup>+</sup>CD34<sup>+</sup>CD19<sup>+</sup>;  
 T cell: CD45<sup>+</sup>GFP<sup>+</sup>CD56<sup>+</sup>CD3<sup>+</sup>

**Supplementary Table 2B** Number of human hematopoietic cells collected from FACS from secondary transplanted mice

|         |           | # FACS sorted cells in secondary transplant |         |          |           |         |         |
|---------|-----------|---------------------------------------------|---------|----------|-----------|---------|---------|
|         |           | Mouse 1                                     | Mouse 2 |          |           | Mouse 1 | Mouse 2 |
| Week 4  | Myeloid   | 1161                                        | 40      | Week 16  | Myeloid   | 393     | 60      |
|         | Erythroid | 0                                           | 0       |          | Erythroid | 0       | 0       |
|         | B cells   | 0                                           | 0       |          | B cells   | 1588    | 15      |
|         | T cells   | 0                                           | 0       |          | T cells   | 0       | 0       |
|         | Total     | 1161                                        | 40      |          | Total     | 1981    | 75      |
| Week 8  | Myeloid   | 40                                          | 17      | Week 20  | Myeloid   | 3       | 36      |
|         | Erythroid | 0                                           | 0       |          | Erythroid | 0       | 13      |
|         | B cells   | 249                                         | 199     |          | B cells   | 23      | 80      |
|         | T cells   | 0                                           | 0       |          | T cells   | 0       | 0       |
|         | Total     | 289                                         | 216     |          | Total     | 26      | 129     |
| Week 12 | Myeloid   | 30                                          | 27      | Week 24* | Myeloid   | 73      | 0       |
|         | Erythroid | 10                                          | 3       |          | Erythroid | 0       | 0       |
|         | B cells   | 266                                         | 25      |          | B cells   | 87      | 17      |
|         | T cells   | 0                                           | 0       |          | T cells   | 0       | 0       |
|         | Total     | 306                                         | 55      |          | Total     | 160     | 17      |

Myeloid: CD45<sup>+</sup>GFP<sup>+</sup>CD15/33<sup>+</sup>;  
 Erythroid: GFP<sup>+</sup>human glyophorin A<sup>+</sup>,  
 B cell: CD45<sup>+</sup>GFP<sup>+</sup>CD34<sup>-</sup>CD19<sup>+</sup>;  
 T cell: CD45<sup>+</sup>GFP<sup>+</sup>CD56<sup>-</sup>CD3<sup>+</sup>

\*: Bone marrow were collected and pooled from all sites (pelvis, left and right legs) at week 24 for analysis.

**Supplementary Table 3A Sensitivity measurements for primary and secondary transplant samples**

| Transplant samples | Control   | False negative clones | True positive clones | Sensitivity |
|--------------------|-----------|-----------------------|----------------------|-------------|
| Primary            | 500 cells | 0/6                   | 6/6                  | 100         |
| Primary            | 100 cells | 0/6                   | 6/6                  | 100         |
| Primary            | 20 cells  | 2/6                   | 4/6                  | 67          |
| Secondary          | 500 cells | 0/11                  | 11/11                | 100         |
| Secondary          | 100 cells | 5/11                  | 6/11                 | 55          |
| Secondary          | 20 cells  | 5/11                  | 6/11                 | 55          |

**Supplementary Table 3B Specificity measurements for primary and secondary transplant samples**

| Transplant samples | Control | False positive clones | True negative clones | Specificity |
|--------------------|---------|-----------------------|----------------------|-------------|
| Primary            | 1       | 0/3                   | 134                  | 100.00      |
| Primary            | 2       | 0/3                   | 177                  | 100.00      |
| Primary            | 3       | 0/3                   | 87                   | 100.00      |
| Primary            | 4       | 1/3                   | 128                  | 99.22       |
| Primary            | 5       | 0/3                   | 177                  | 100.00      |
| Primary            | 6       | 0/3                   | 260                  | 100.00      |
| Primary            | Average |                       |                      | 99.87       |
| <b>Secondary</b>   |         |                       |                      |             |
| Secondary          | 1       | 0                     | 56                   | 100         |
| Secondary          | 2       | 0                     | 181                  | 100         |
| Secondary          | 3       | 0                     | 169                  | 100         |
| Secondary          | 4       | 0                     | 111                  | 100         |
| Secondary          | 5       | 0                     | 91                   | 100         |
| Secondary          | 6       | 0                     | 136                  | 100         |
| Secondary          | 7       | 0                     | 118                  | 100         |
| Secondary          | 8       | 0                     | 98                   | 100         |
| Secondary          | 9       | 0                     | 55                   | 100         |
| Secondary          | 10      | 0                     | 234                  | 100         |
| Secondary          | 11      | 0                     | 125                  | 100         |
| Secondary          | Average |                       |                      | 100         |



**Supplementary Table 5**     **2 x 2 contingency table of T-cell producing activity of all week 27 clones at end-point of primary transplant versus secondary repopulating activity**

| Number of clones at 27 weeks post-transplant in primary mice with: |                              |                                 |       |
|--------------------------------------------------------------------|------------------------------|---------------------------------|-------|
|                                                                    | detectable T-cell production | no detectable T-cell production | Total |
| Secondary repopulation                                             | 3                            | 3                               | 6     |
| No secondary repopulation                                          | 6                            | 19                              | 25    |
| Total                                                              | 9                            | 22                              | 31    |

P-value of Fisher's exact test = 0.32

**Supplementary Table 6 Mature cells (x 10<sup>3</sup>) in clones detected only in secondary recipients**

|                      |    | Clone S2  |      |     | Clone S3  |      |     | Clone S11 |      |     | Clone S1  |       |     | Clone S4  |      |     |  |
|----------------------|----|-----------|------|-----|-----------|------|-----|-----------|------|-----|-----------|-------|-----|-----------|------|-----|--|
| Week                 |    | M         | B    | T   | M         | B    | T   | M         | B    | T   | M         | B     | T   | M         | B    | T   |  |
| Secondary recipients | 4  | -/-       | -/-  | -/- | -/-       | -/-  | -/- | -/-       | -/-  | -/- | -/-       | -/-   | -/- | -/-       | -/-  | -/- |  |
|                      | 8  | -/37      | -/-  | -/- | 22/-      | -/-  | -/- | -/-       | -/-  | -/- | -/-       | -/0.7 | -/- | -/-       | -/-  | -/- |  |
|                      | 12 | -/-       | -/-  | -/- | -/-       | -/46 | -/- | -/-       | 76/6 | -/- | -/-       | -/-   | -/- | -/-       | -/41 | -/- |  |
|                      | 16 | -/-       | 33/- | -/- | -/-       | -/-  | -/- | -/-       | -/-  | -/- | -/-       | -/-   | -/- | -/-       | -/-  | -/- |  |
|                      | 20 | -/-       | -/4  | -/- | -/-       | -/-  | -/- | -/-       | -/-  | -/- | -/-       | -/-   | -/- | -/-       | -/-  | -/- |  |
|                      | 24 | -/-       | -/-  | -/- | -/-       | -/-  | -/- | -/-       | -/-  | -/- | -/-       | -/-   | -/- | -/-       | -/-  | -/- |  |
|                      |    | Clone S5  |      |     | Clone S6  |      |     | Clone S7  |      |     | Clone S8  |       |     | Clone S9  |      |     |  |
| Week                 |    | M         | B    | T   | M         | B    | T   | M         | B    | T   | M         | B     | T   | M         | B    | T   |  |
| Secondary recipients | 4  | -/-       | -/-  | -/- | -/-       | -/-  | -/- | -/-       | -/-  | -/- | -/-       | -/-   | -/- | -/-       | -/-  | -/- |  |
|                      | 8  | -/-       | -/-  | -/- | -/-       | -/-  | -/- | -/-       | -/-  | -/- | -/-       | -/-   | -/- | -/-       | 3/-  | -/- |  |
|                      | 12 | -/-       | -/38 | -/- | -/-       | -/-  | -/- | -/-       | -/-  | -/- | -/-       | -/-   | -/- | -/-       | -/-  | -/- |  |
|                      | 16 | -/-       | -/-  | -/- | -/-       | -/-  | -/- | -/-       | -/-  | -/- | -/-       | -/-   | -/- | -/-       | -/-  | -/- |  |
|                      | 20 | -/-       | -/-  | -/- | 9/-       | -/-  | -/- | -/45*     | -/-  | -/- | -/4*      | -/-   | -/- | -/-       | -/-  | -/- |  |
|                      | 24 | -/-       | -/-  | -/- | -/-       | -/-  | -/- | -/-       | -/-  | -/- | -/-       | -/-   | -/- | -/-       | -/-  | -/- |  |
|                      |    | Clone S10 |      |     | Clone S12 |      |     | Clone S13 |      |     | Clone S14 |       |     | Clone S15 |      |     |  |
| Week                 |    | M         | B    | T   | M         | B    | T   | M         | B    | T   | M         | B     | T   | M         | B    | T   |  |
| Secondary recipients | 4  | -/-       | -/-  | -/- | -/-       | -/-  | -/- | -/-       | -/-  | -/- | -/-       | -/-   | -/- | -/-       | -/-  | -/- |  |
|                      | 8  | -/-       | 1/-  | -/- | -/-       | -/-  | -/- | -/-       | -/-  | -/- | -/-       | -/-   | -/- | -/-       | -/-  | -/- |  |
|                      | 12 | -/-       | -/-  | -/- | -/-       | -/-  | -/- | -/-       | -/-  | -/- | -/-       | -/-   | -/- | -/-       | -/-  | -/- |  |
|                      | 16 | -/-       | -/-  | -/- | 14/-      | -/-  | -/- | 5/-       | -/-  | -/- | -/-       | 18/-  | -/- | -/-       | -/-  | -/- |  |
|                      | 20 | -/-       | -/-  | -/- | -/-       | -/-  | -/- | -/-       | -/-  | -/- | -/-       | -/-   | -/- | -/-       | -/-  | -/- |  |
|                      | 24 | -/-       | -/-  | -/- | -/-       | -/-  | -/- | -/-       | -/-  | -/- | -/-       | -/-   | -/- | -/-       | 5/-  | -/- |  |
|                      |    | Clone S16 |      |     | Clone S17 |      |     | Clone S18 |      |     | Clone S19 |       |     | Clone S20 |      |     |  |
| Week                 |    | M         | B    | T   | M         | B    | T   | M         | B    | T   | M         | B     | T   | M         | B    | T   |  |
| Secondary recipients | 4  | -/-       | -/-  | -/- | -/-       | -/-  | -/- | -/-       | -/-  | -/- | -/-       | -/-   | -/- | -/-       | -/-  | -/- |  |
|                      | 8  | -/-       | -/-  | -/- | -/-       | -/-  | -/- | -/-       | -/-  | -/- | -/-       | -/-   | -/- | -/-       | -/-  | -/- |  |
|                      | 12 | -/-       | -/-  | -/- | -/-       | -/-  | -/- | -/9       | -/-  | -/- | -/8       | -/-   | -/- | -/7       | -/-  | -/- |  |
|                      | 16 | -/-       | -/-  | -/- | -/-       | -/-  | -/- | -/-       | -/-  | -/- | -/-       | -/-   | -/- | -/-       | -/-  | -/- |  |
|                      | 20 | -/-       | -/-  | -/- | -/-       | 41/- | -/- | -/-       | -/-  | -/- | -/-       | -/-   | -/- | -/-       | -/-  | -/- |  |
|                      | 24 | 3/-       | -/-  | -/- | -/-       | -/-  | -/- | -/-       | -/-  | -/- | -/-       | -/-   | -/- | -/-       | -/-  | -/- |  |
|                      |    | Clone S21 |      |     | Clone S22 |      |     |           |      |     |           |       |     |           |      |     |  |
| Week                 |    | M         | B    | T   | M         | B    | T   |           |      |     |           |       |     |           |      |     |  |
| Secondary recipients | 4  | -/-       | -/-  | -/- | -/-       | -/-  | -/- |           |      |     |           |       |     |           |      |     |  |
|                      | 8  | -/-       | -/-  | -/- | -/-       | -/-  | -/- |           |      |     |           |       |     |           |      |     |  |
|                      | 12 | -/2       | -/-  | -/- | -/-       | -/6  | -/- |           |      |     |           |       |     |           |      |     |  |
|                      | 16 | -/-       | -/-  | -/- | -/-       | -/-  | -/- |           |      |     |           |       |     |           |      |     |  |
|                      | 20 | -/-       | -/-  | -/- | -/-       | -/-  | -/- |           |      |     |           |       |     |           |      |     |  |
|                      | 24 | -/-       | -/-  | -/- | -/-       | -/-  | -/- |           |      |     |           |       |     |           |      |     |  |

\*Only erythroid output recorded. M: myeloid; B: B cells; T: T cells; -: no detectable output

**Supplementary Table 7 “New” clones detected in secondary recipients (but below the threshold of detection in the primary recipient)**

| "New" Secondary clone | Barcode sequence             | Sample detected                     | # Reads |
|-----------------------|------------------------------|-------------------------------------|---------|
| S1                    | GCATCTTGATCGAAAGCGGTCCAACCTC | 27 week (right femur):<br>T-cells   | 148     |
|                       |                              | 27 week (left femur):<br>T-cells,   | 2       |
| S3                    | TGATCCAGATCGAAACTGGTCTAACCG  | 16 week (femur):<br>Myeloid cells   | 42      |
|                       |                              | 27 week (right femur):<br>B-cells,  | 2       |
| S5                    | CAATCCCGATCCAAACCGGTCCAACCT  | 27 week (right femur):<br>T-cells,  | 65      |
| S7                    | CCATCAGGATGGAAAAGGGTGGAAACGG | 4 week (femur):<br>Myeloid cells    | 14      |
| S11                   | TGATCGAGATCGAAATGGGTGCAACGG  | 27 week (right femur):<br>T-cells,  | 188     |
|                       |                              | 27 week (pelvis):<br>Myeloid cells, | 78      |

## **SUPPLEMENTARY FIGURE LEGENDS**

**Supplementary Fig. 1 FACS sorting of various lineages of human hematopoietic cells from mouse bone marrow.** Representative FACS plots showing the sorting strategy used for the collection of various human cell lineages from mouse BM samples. Erythroid=GFP<sup>+</sup>human glyophorin A<sup>+</sup>, Myeloid=CD45<sup>+</sup>GFP<sup>+</sup>CD15/33<sup>+</sup>; B cell=CD45<sup>+</sup>GFP<sup>+</sup>CD34<sup>-</sup>CD19<sup>+</sup>; T cell=CD45<sup>+</sup>GFP<sup>+</sup>CD56<sup>-</sup>CD3<sup>+</sup>.

**Supplementary Fig. 2 Determination of cell numbers from barcode read abundance.** (A) Polynomial regressions for relationships determined for analysis of primary (56 control samples) and secondary (22 control samples) transplant samples. Shaded regions in gray represent 95% confidence intervals. (B) Correlation of cell numbers identified by FACS and MPS analysis. Each data point represents an individual cell sample sorted by FACS and also analyzed by MPS.

**Supplementary Fig. 3 Lineage outputs of all clones detected.** (A) Heatmap of the lymphoid (red) and myeloid (blue) cell contribution of all 196 clones tracked over time in primary and secondary mice. The contribution to each clone is represented by a horizontal bar of increasing intensity according to the number of cells it

contained of that lineage type so that the plot resembles a virtual Southern blot. **(B)** Lineage outputs by clones that appeared in primary mice and persisted until 27 weeks post-transplant. Number in each plot indicates the respective clone ID.

**Supplementary Fig. 4** **(A)** Percentage of week 27 clones detectable at the indicated BM sites in each of the primary transplanted mouse. The total number of clones detected in each mouse is also indicated. **(B)** GM/(B+T) ratio of all 16 clones at different BM sites at week 27 in the 2 primary mice. **(C)** Clones having a size of  $>5.5 \times 10^5$  cells display a smaller standard deviation (SD) of the GM/(B+T) ratios determined at different BM sites (left panel). Change in GM/(B+T) ratio both within clones and in the differentiation features of clones that appeared at successively later times are shown (middle and right panel). Serial analysis of the relative lineage output of 8 of the 27 week clones that display  $\geq 10$ -fold increase (middle panel) compared to only 1 clone with  $\geq 10$ -fold decrease (right panel) in their GM/(B+T) ratio within the 27 weeks post-transplant.

# Supplementary Figure 1

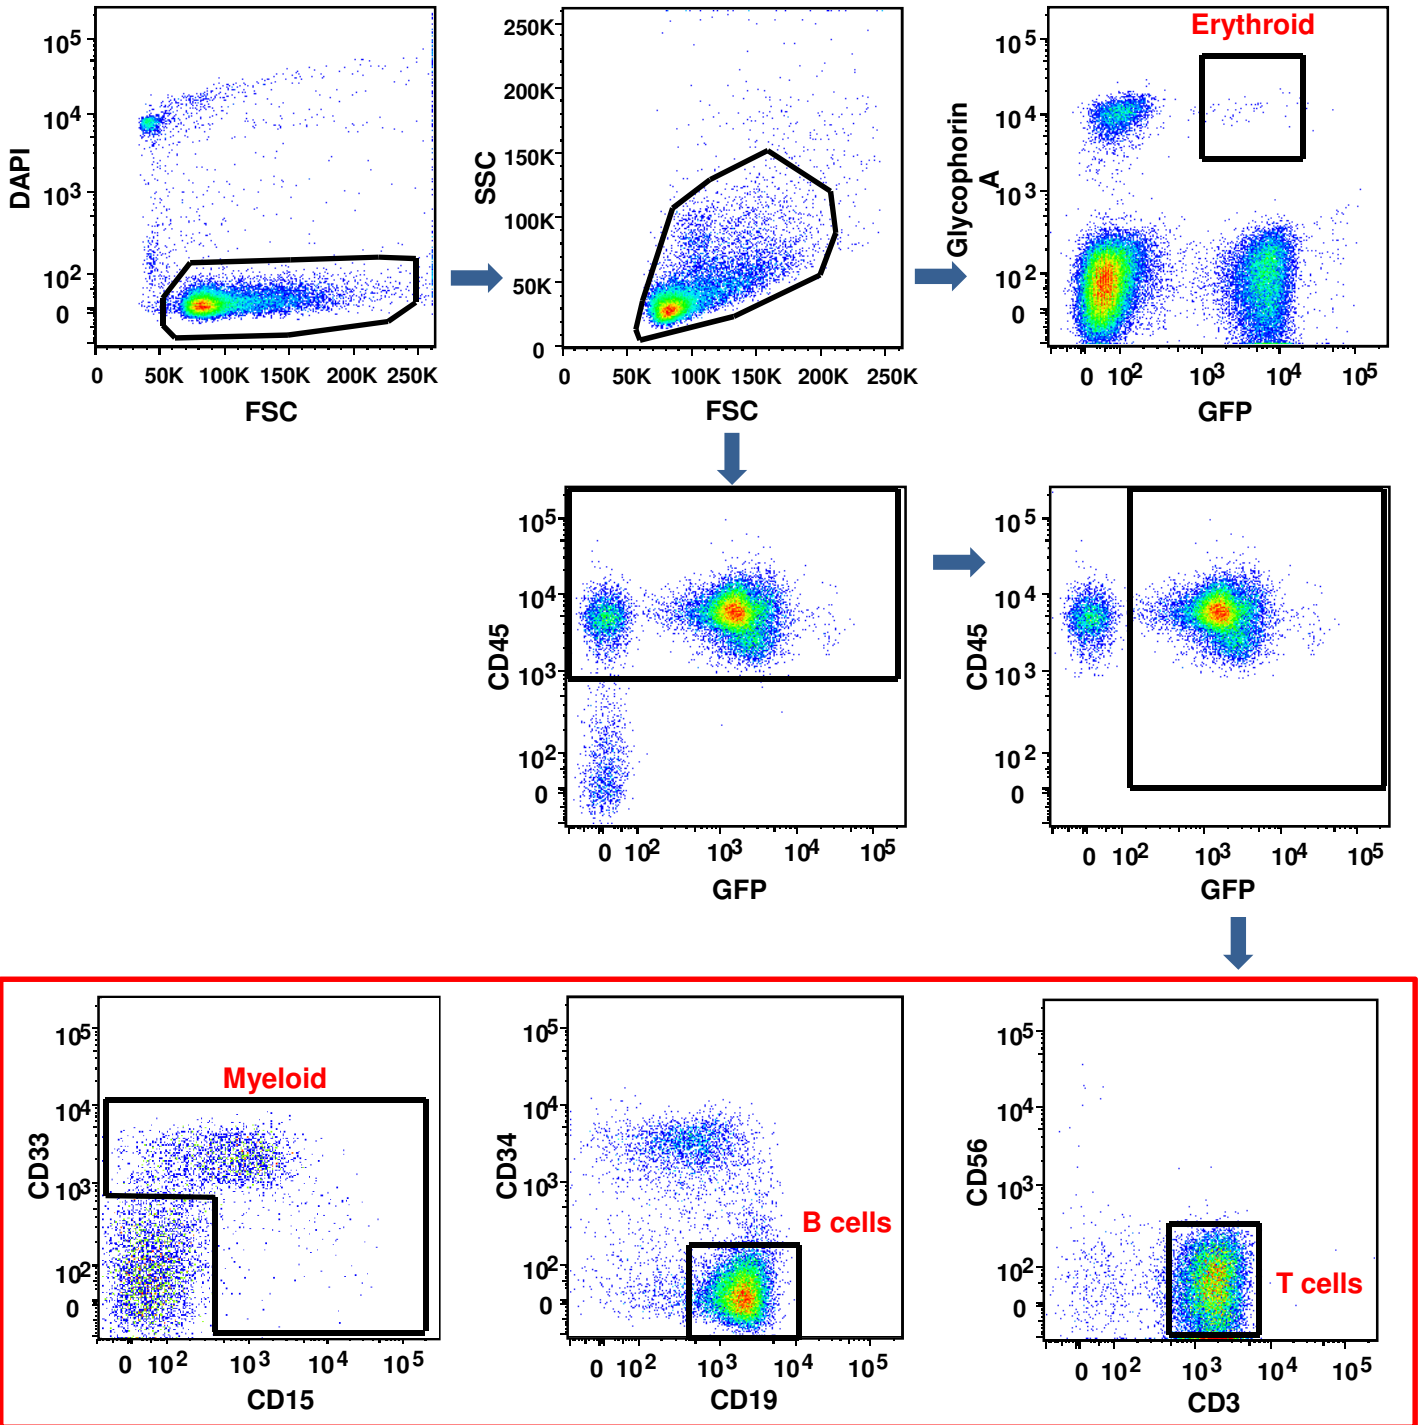

## Supplementary Figure 2

**A**

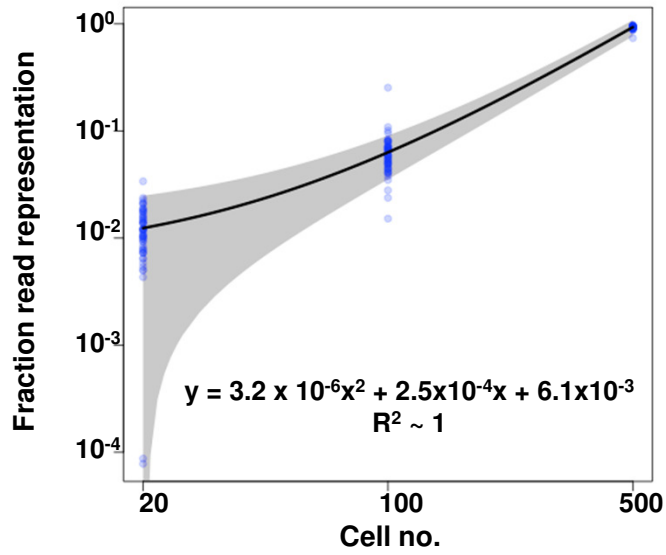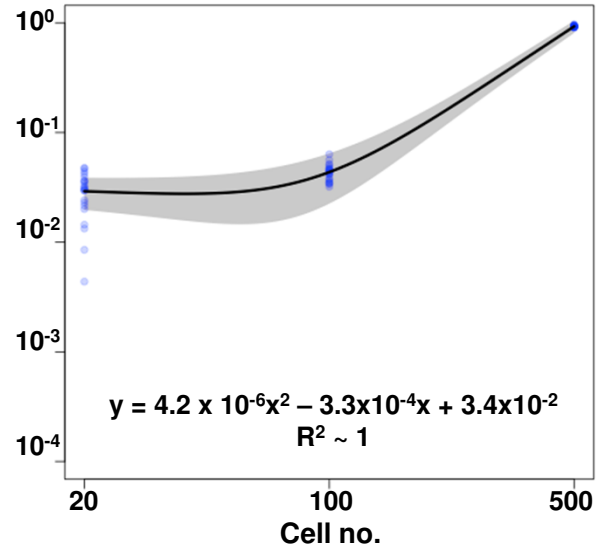

**B**

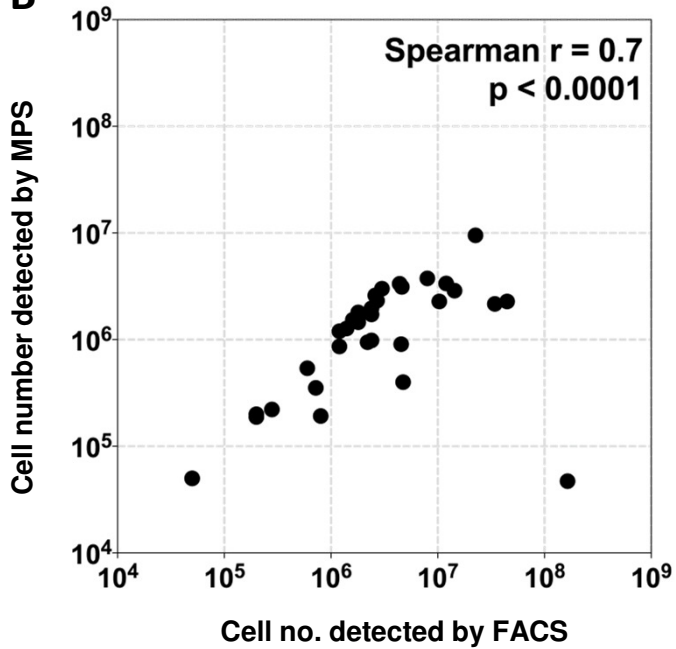

# Supplementary Figure 3

A

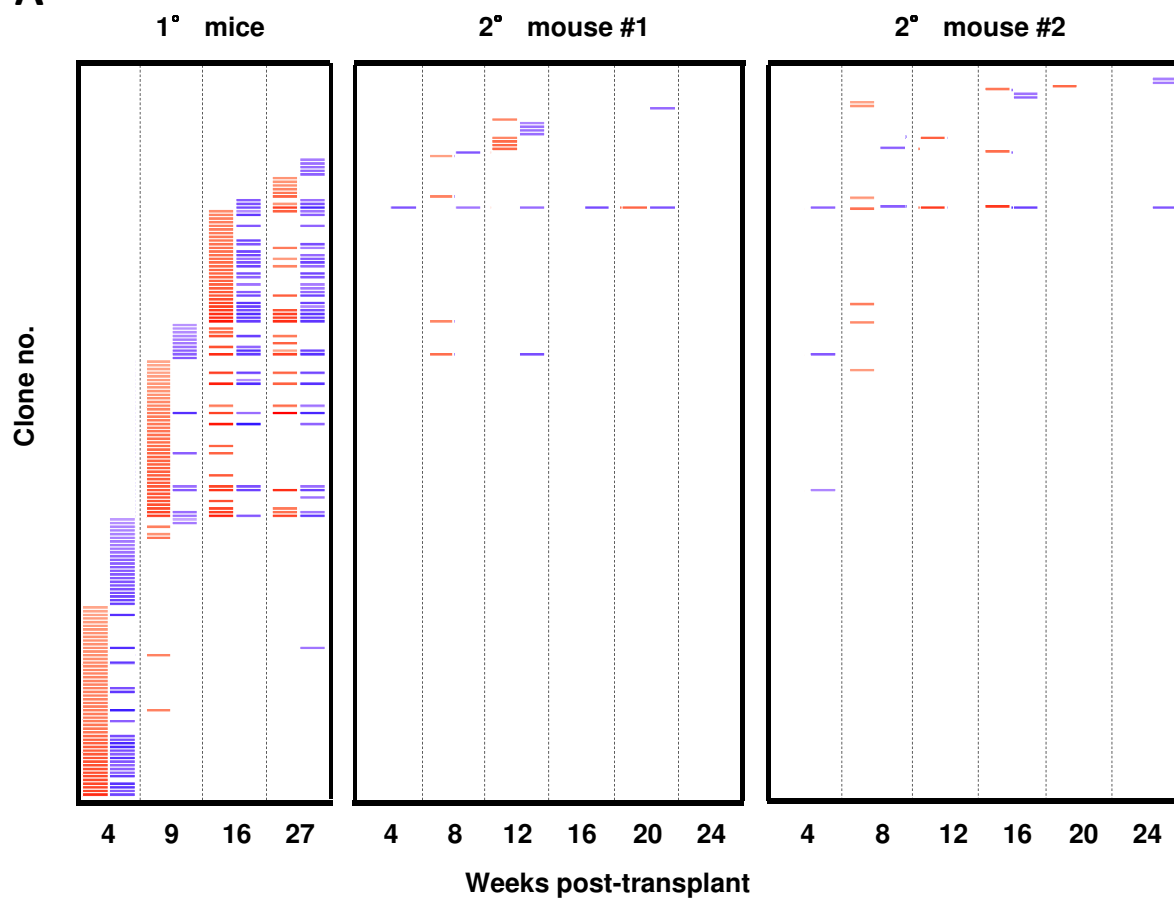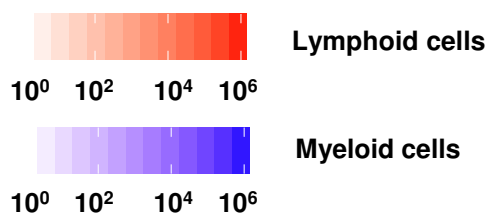



# Supplementary Figure 3

## B

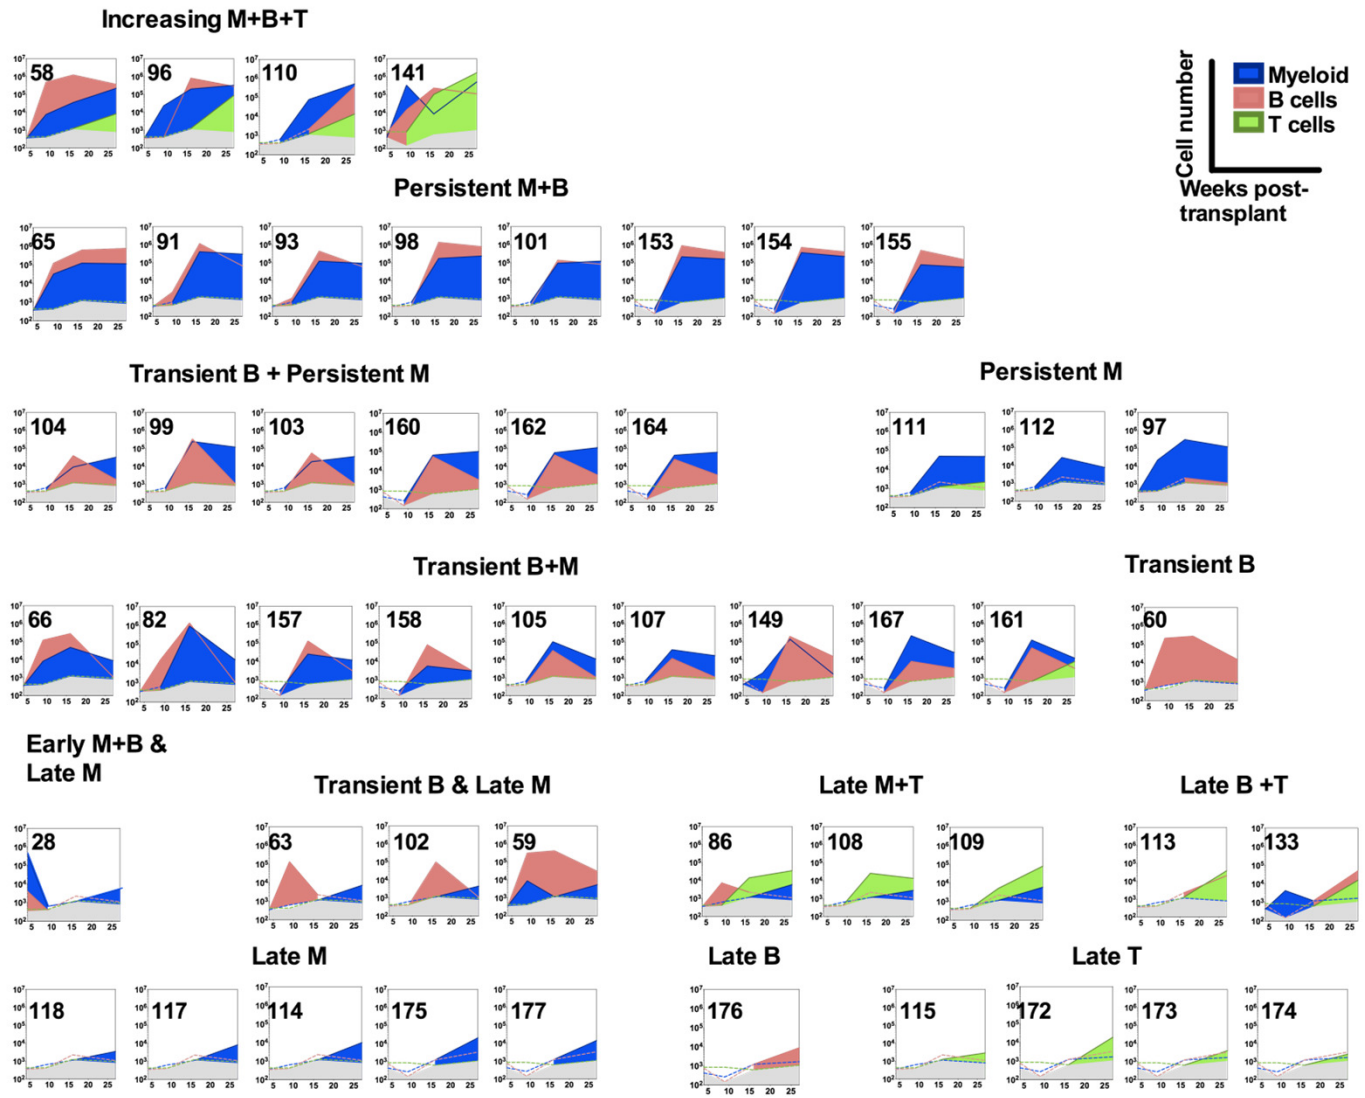

# Supplementary Figure 4

**A**

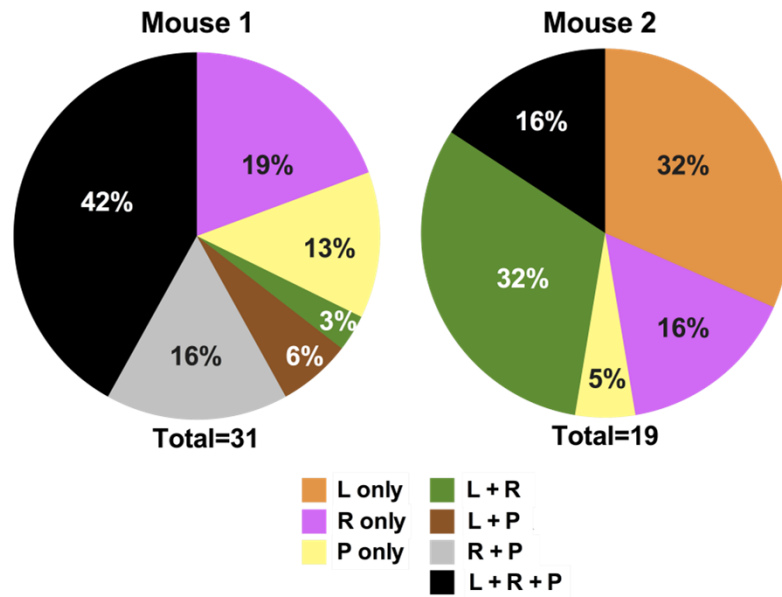

**B**

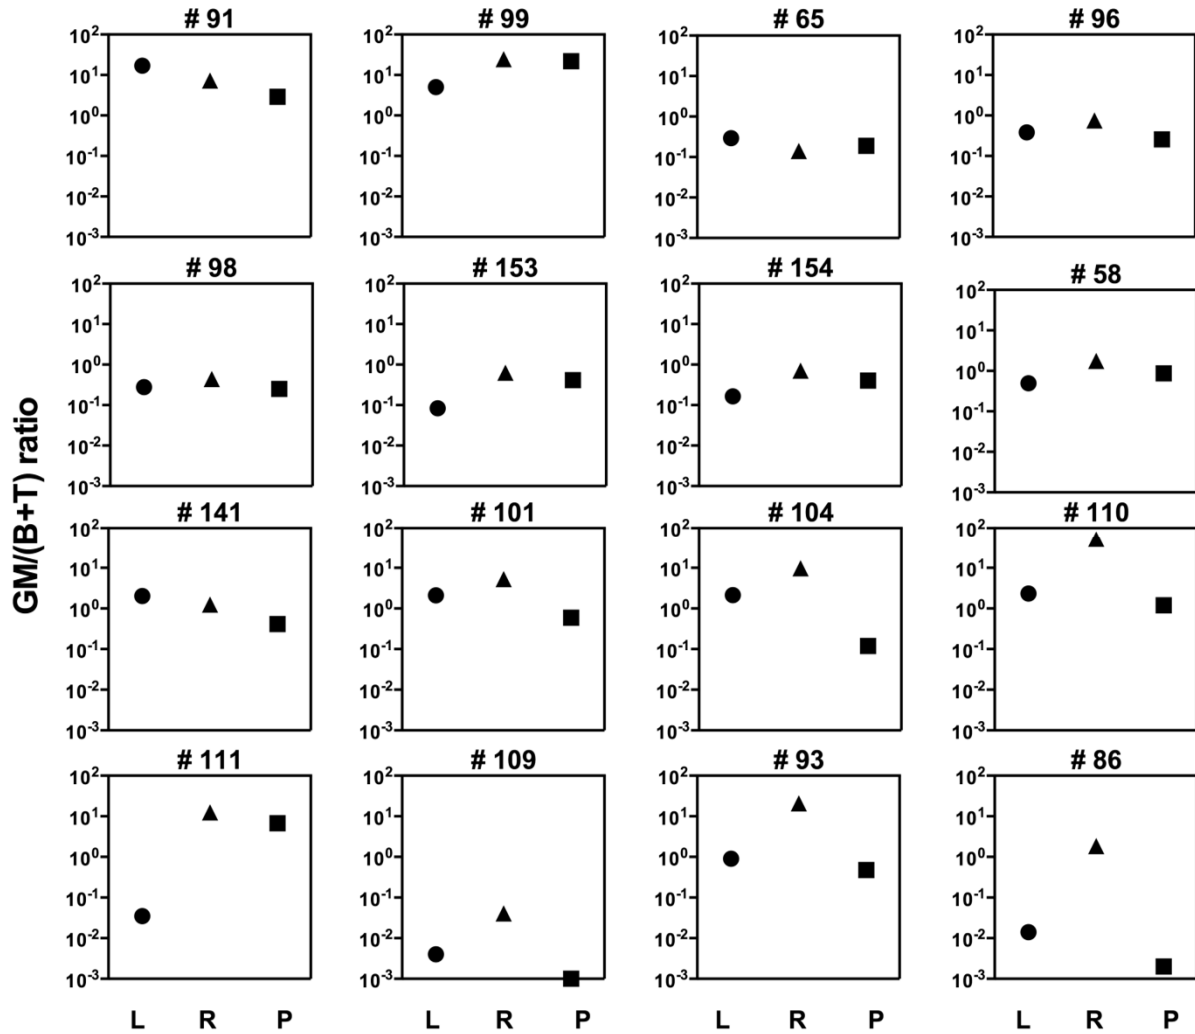

# Supplementary Figure 4

C

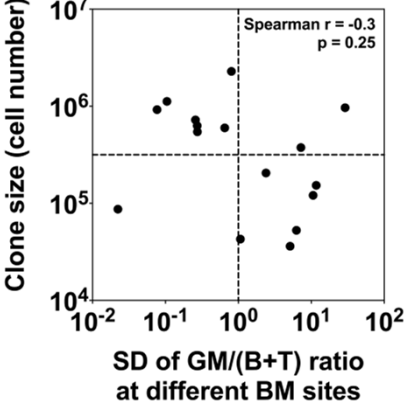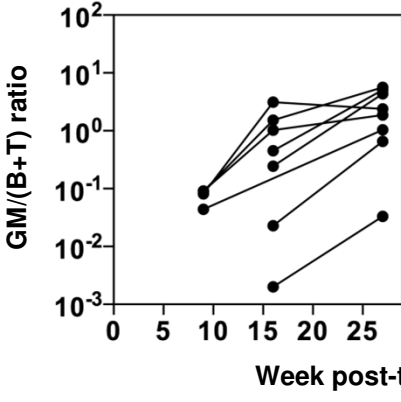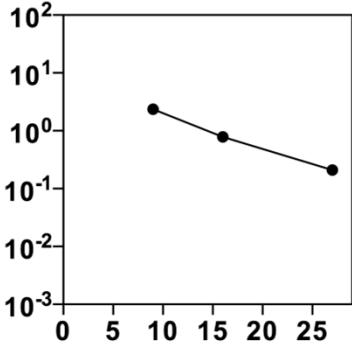

Supplement: supp_blood-2013-06-508432_blood-2013-06-508432-1.pdf [file supp_blood-2013-06-508432_blood-2013-06-508432-1.pdf]
